# Supplementary material for: Coherent arrangement of perylene diimide derivative via adhesion-controlled transfer for noise-suppressed light signal detection
Source: Royal Society of Chemistry journal article supplement (doi:10.1039/d3ta07116b), 2024-01-01
Supplement: d3ta07116b1.pdf [file d3ta07116b1.pdf]

## Supporting Information

# **Coherent Arrangement of Perylene Diimide Derivative via Adhesion-Controlled Transfer for Noise-Suppressed Light Signal Detection**

*Jihyun Lim<sup>a</sup>, Woongsik Jang<sup>b</sup> Zhao Yang<sup>b</sup> and Dong Hwan Wang<sup>a,b,\*</sup>*

<sup>a</sup>Department of Intelligent Semiconductor Engineering, Chung-Ang University, 84 Heukseok-ro, Dongjak-gu, Seoul 06974, Republic of Korea

<sup>b</sup>School of Integrative Engineering, Chung-Ang University, 84 Heukseok-ro, Dongjak -gu, Seoul 06974, Republic of Korea

E-mail: king0401@cau.ac.kr

• **Functionalized Polymer Delamination Substrate Fabrication for coherent arrangement Assembly NPDI**

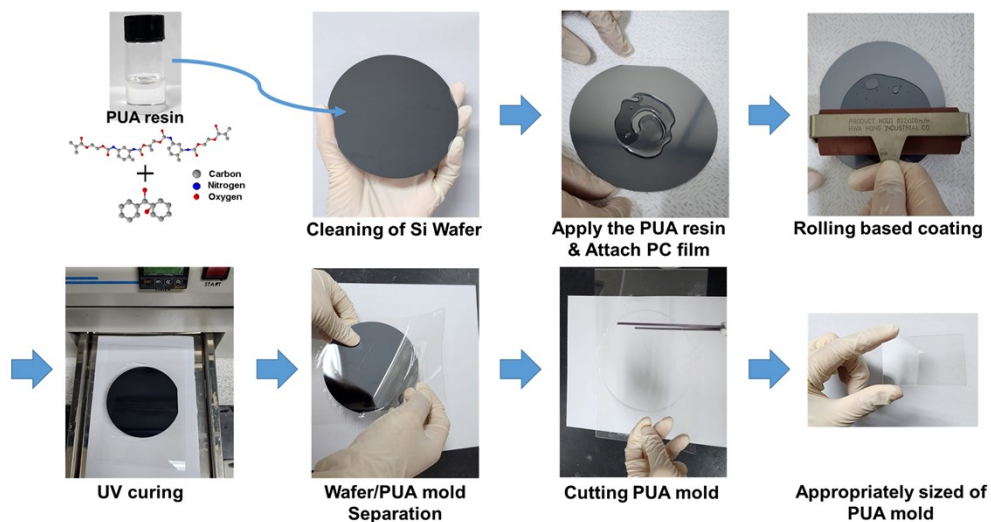

**Fig. S1.** Mold fabrication process for the coherent arrangement assembly of NPDI

**NPDI in Methanol**

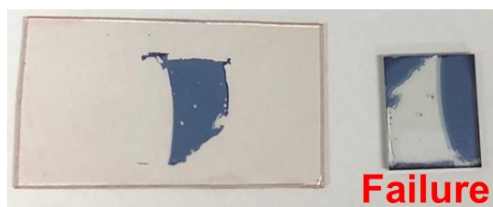

**NPDI in Trifluoroethanol (TFE)**

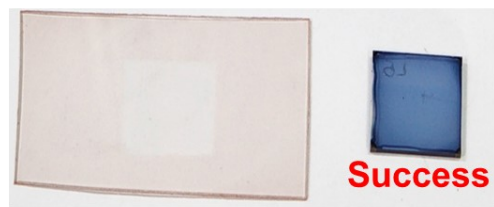

**Fig. S2.** Photographic images of the formation of the coherent arrangement of NPDI layers using methanol or trifluoroethanol (TFE) as the solvent.

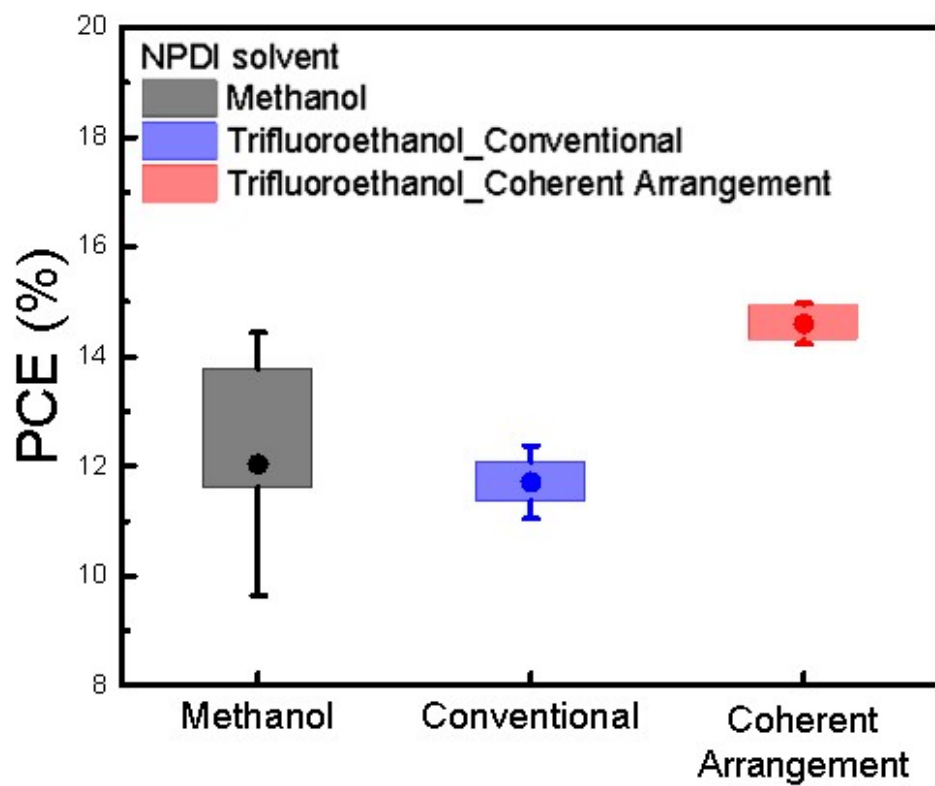

**Fig. S3.** PCE of the NPDI electron transport layer with methanol or trifluoroethanol as the solvent

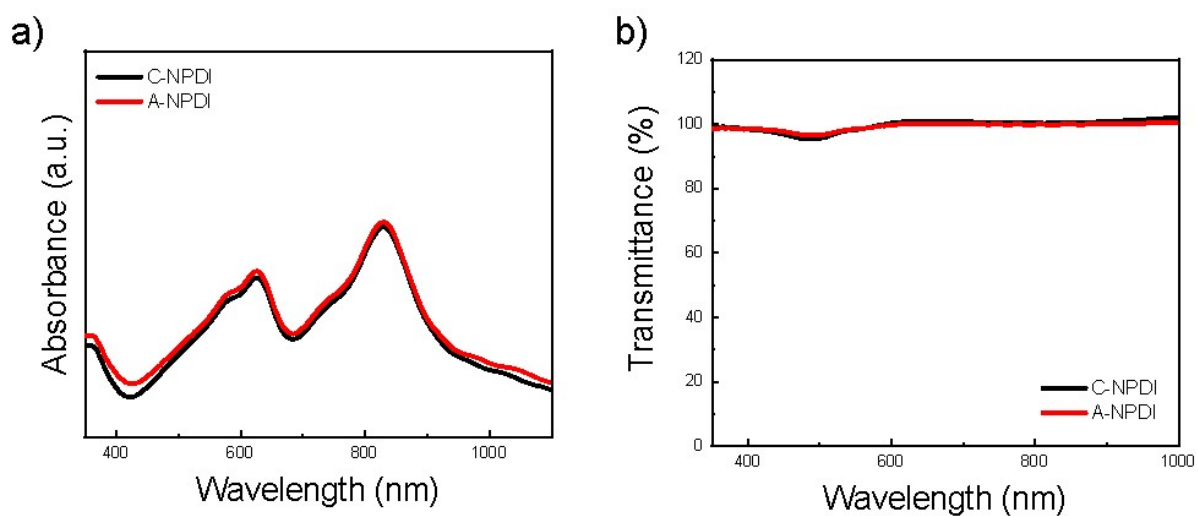

**Fig. S4.** (a) UV-visible absorbance spectra and (b) transmittance analysis for PEDOT:PSS/PM6:Y12/NPDI devices with coherent arrangement of NPDI (red line) and conventional NPDI (black line).

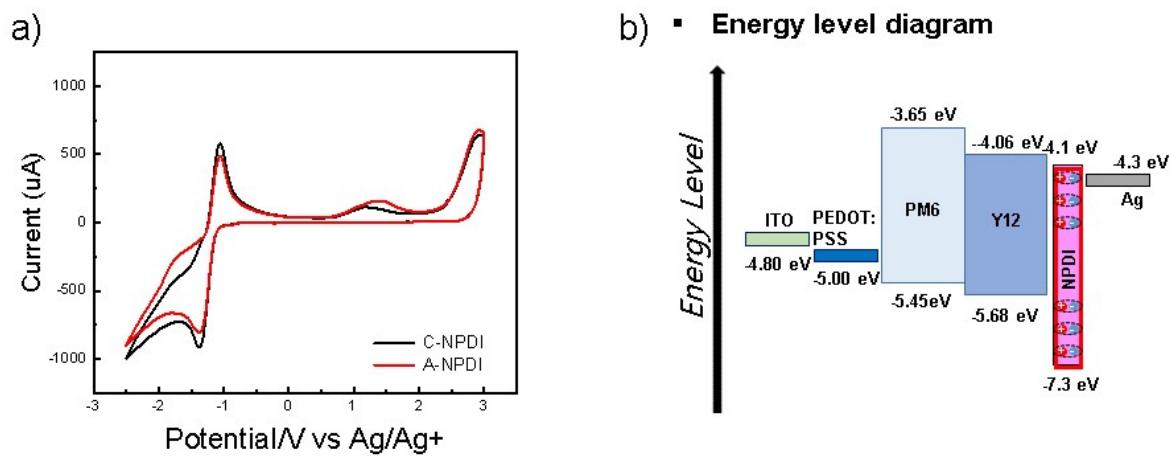

**Fig. S5.** Cyclic voltammetry analysis of coherent arrangement of NPDI (red line) and conventional NPDI (black line). (b) Energy level diagram of the device.

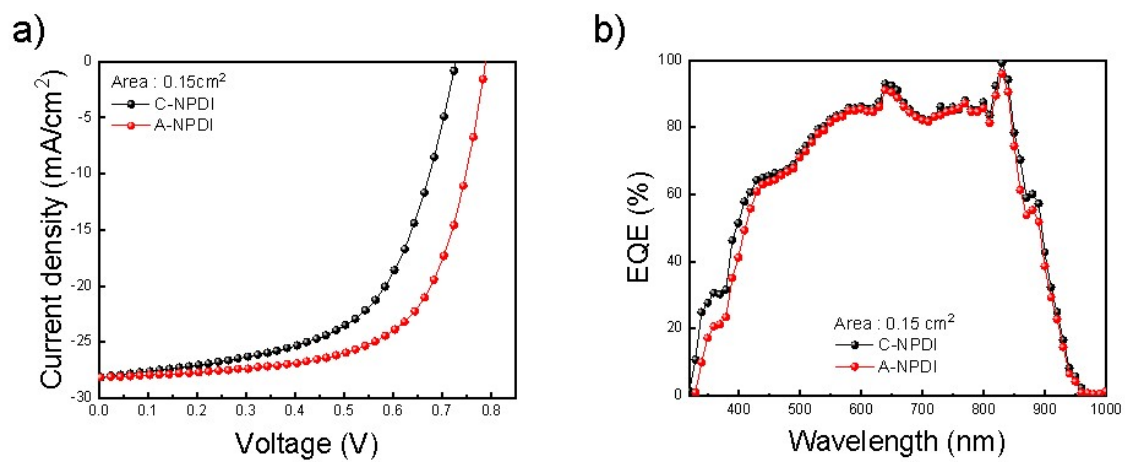

**Fig. S6.** (a) Current density–voltage curves under illumination (100 mW/cm<sup>2</sup>) and (b) EQE spectra for PEDOT:PSS/PM6:Y12/NPDI devices with a coherent arrangement of NPDI (red line) and conventional NPDI (black line) (Area: 0.15 cm<sup>2</sup>).

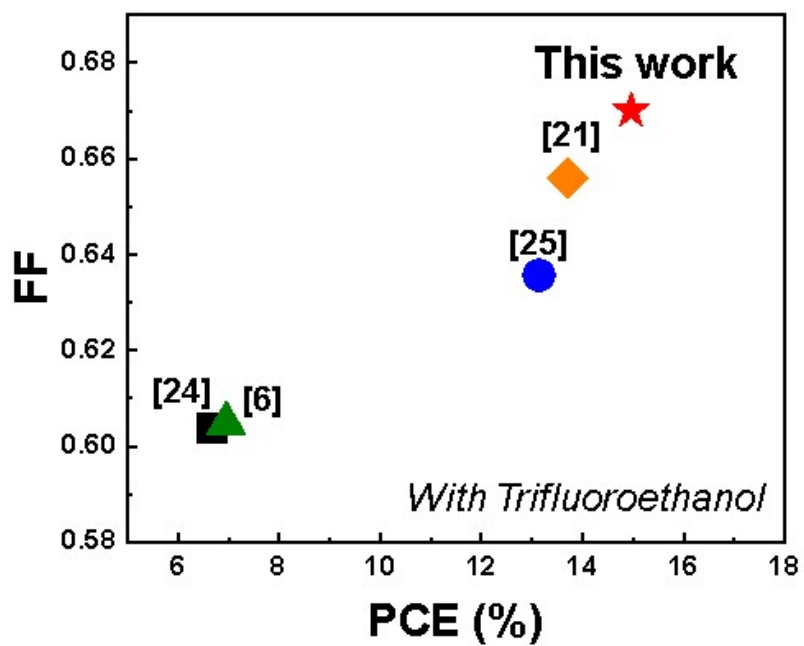

**Fig. S7.** Chart of reported FF and PCE for non-fullerene acceptor based organic photovoltaic devices with 2,2,2- trifluoroethanol.



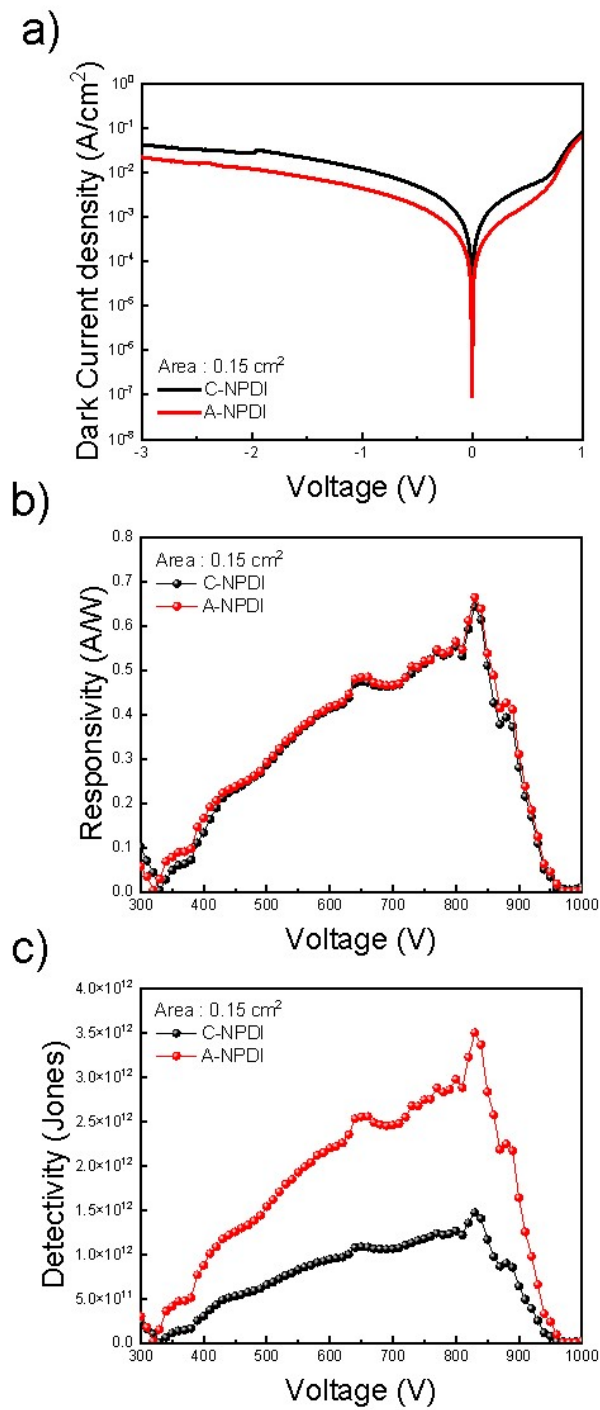

**Fig. S8.** (a) Dark current density–voltage curves, (b) responsivity at 0 V, and (c) detectivity at 0 V for an area of 0.15 cm<sup>2</sup> for OPD devices with a coherent arrangement NPDI (red line) and conventional NPDI (black line).

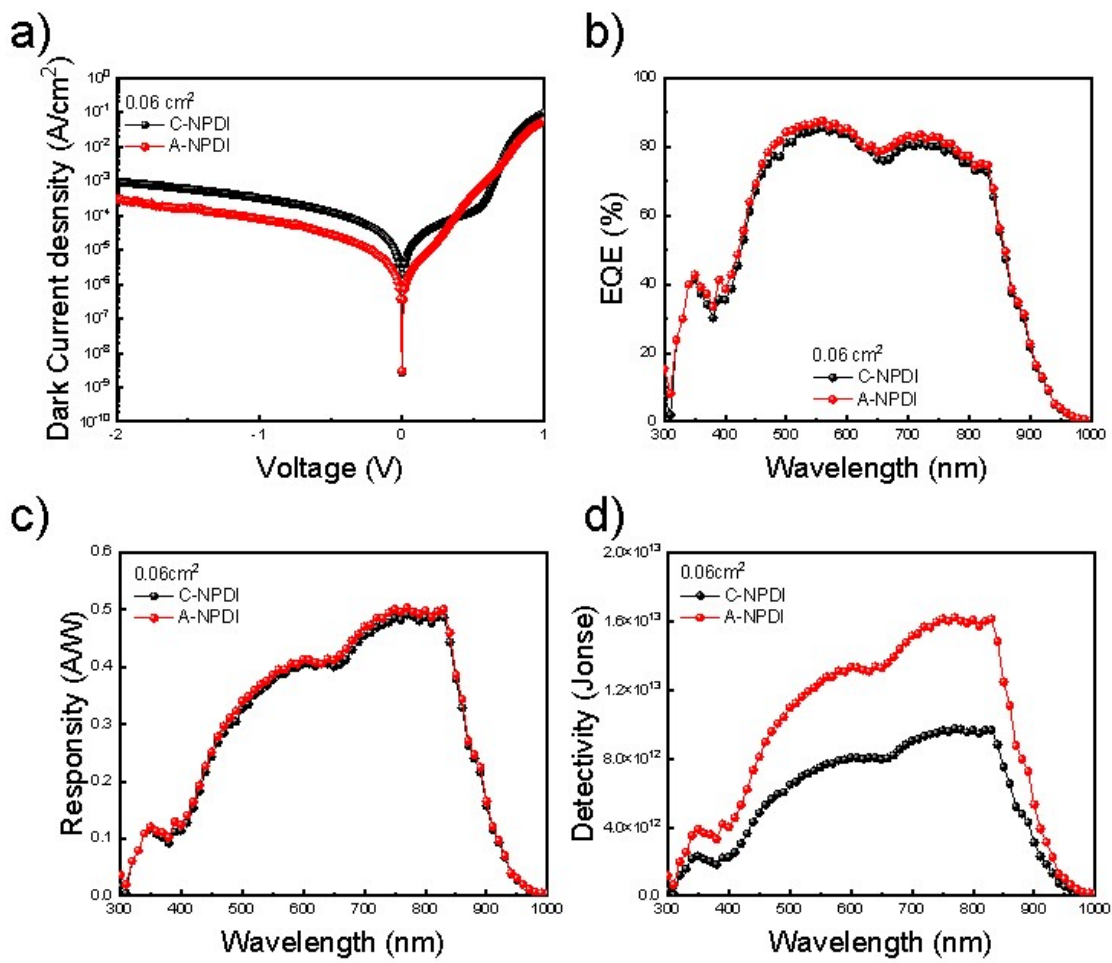

**Fig. S9.** (a) Dark current density–voltage curves, (b) EQE, (c) responsivity at 0 V, and (d) detectivity at 0 V for an area of  $0.06 \text{ cm}^2$  for OPD devices with a coherent arrangement NPDI (red line) and conventional NPDI (black line).

a) With C-NPDI

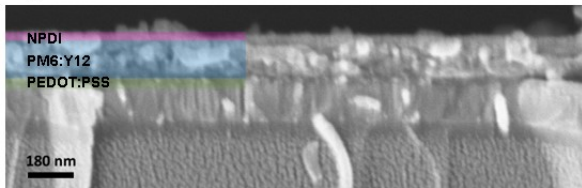

b) With A-NPDI

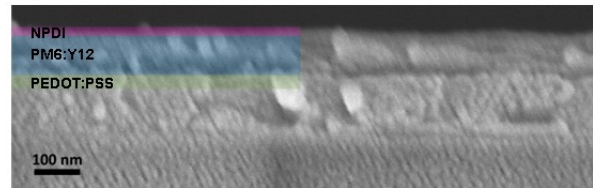

**Fig. S10.** FE-SEM cross-sections of PEDOT:PSS/PM6:Y12/NPDI devices with (a) conventional NPDI and (b) coherent arrangement NPDI.

a) Conventional NPDI

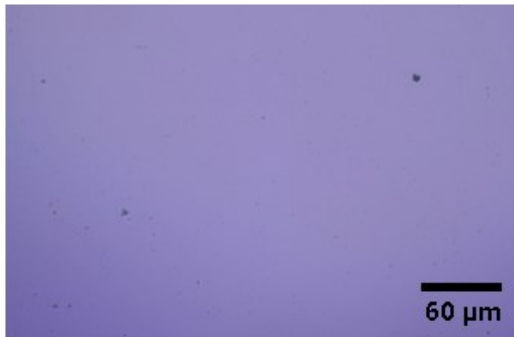

b) Coherent Arrangement NPDI

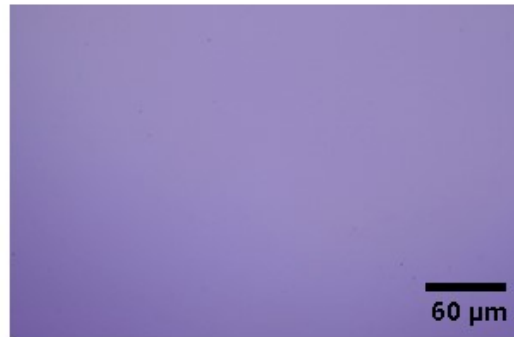

**Fig. S11.** Optical microscopic images of (a) conventional NPDI and (b) coherent arrangement of NPDI films.

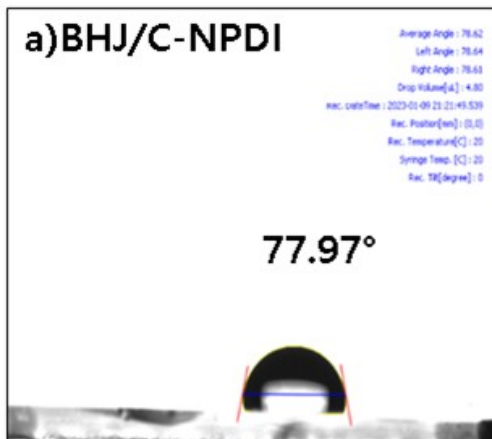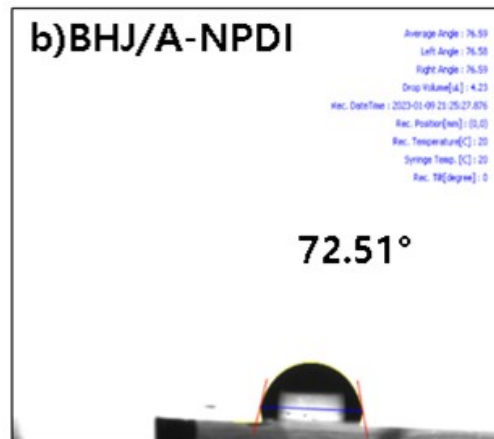

**Fig. S12.** DI water contact angle analysis of BHJ with (a) conventional NPDI and (b) coherent arrangement NPDI films.

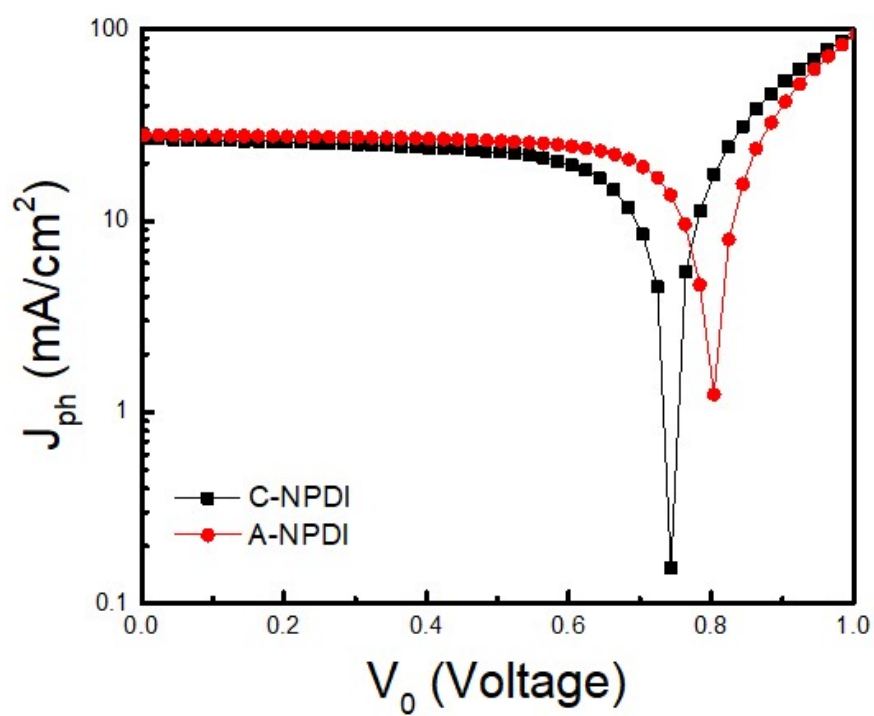

**Fig. S13.** Compensation voltages under illumination of C-NPDI based device and A-NPDI based device.

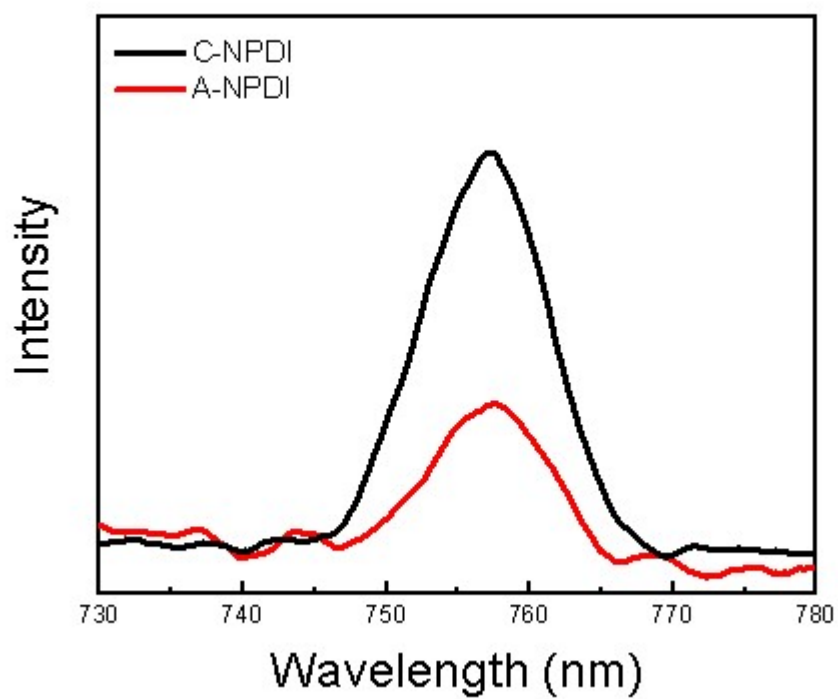

**Fig. S14.** Photoluminescence analysis of ITO/PEDOT:PSS/PM6:Y12/NPDI devices with coherent arrangement NPDI (red line) and conventional NPDI (black line),

**a**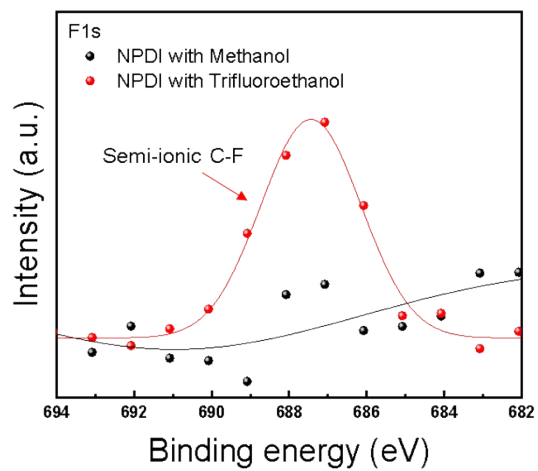**b**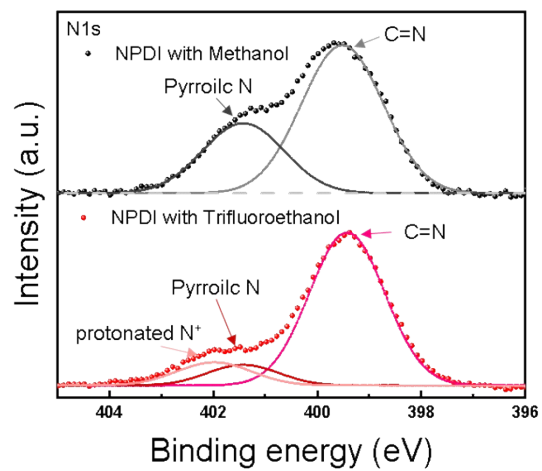

**Fig. S15.** XPS survey spectra of the atomic core levels for the NPDI with methanol and trifluoroethanol; a) F1s, b) N1s.



**Table S1.** Surface energy parameters for various films.

| <b>Material</b>                | $\gamma_{SV}$<br>(mJ/m <sup>2</sup> ) | $\gamma_{SV}^p$<br>(mJ/m <sup>2</sup> ) | $\gamma_{SV}^d$<br>(mJ/m <sup>2</sup> ) |
|--------------------------------|---------------------------------------|-----------------------------------------|-----------------------------------------|
| <b>PUA</b>                     | 55.66                                 | 46.12                                   | 9.53                                    |
| <b>BHJ (PM6:Y12)</b>           | 34.11                                 | 31.87                                   | 2.23                                    |
| <b>NPDI</b><br><b>Methanol</b> | 76.15                                 | 40.99                                   | 35.16                                   |
| <b>Trifluoroethanol</b>        | 77.30                                 | 43.75                                   | 33.55                                   |

**Table S2.** Calculated interfacial surface energy for NPDI, BHJ, and PUA.

| <b>PM6:Y12</b>                    | <b>Material</b> | <b>Interfacial energy</b><br>[mJ m <sup>-2</sup> ] |
|-----------------------------------|-----------------|----------------------------------------------------|
|                                   | PUA             | 3.87                                               |
| <b>NPDI with methanol</b>         | PUA             | 8.23                                               |
|                                   | PM6:Y12         | 20.26                                              |
| <b>NPDI with trifluoroethanol</b> | PUA             | 7.35                                               |
|                                   | PM6:Y12         | 19.43                                              |

**Table S3.** Hansen solubility parameters for the solvents.

| Solvent                        | $\delta/\text{MPa}^{1/2}$ |            |            |            |
|--------------------------------|---------------------------|------------|------------|------------|
|                                | $\delta_t$                | $\delta_d$ | $\delta_p$ | $\delta_h$ |
| <b>o-Xylene</b>                | 18                        | 17.8       | 1          | 3.1        |
| <b>Methanol</b>                | 29.6                      | 15.1       | 12.3       | 22.3       |
| <b>Ethanol</b>                 | 26.5                      | 15.8       | 8.8        | 19.4       |
| <b>2,2,2-Trifluoro Ethanol</b> | 24.02                     | 15.47      | 8.3        | 16.4       |

**Table S4.** Calculated interfacial surface energy for NPDI, BHJ, and PUA.

| NPDI                            | E (oxidation) | E (reduction) | Band gap | HOMO  | LUMO  |
|---------------------------------|---------------|---------------|----------|-------|-------|
| <b>Conventional</b>             | 2.44          | -0.78         | -3.23    | -7.33 | -4.10 |
| <b>Coherent<br/>Arrangement</b> | 2.46          | -0.74         | -3.21    | -7.35 | -4.14 |

**Table S5.** Photovoltaic parameters for OPVs with a coherent arrangement of NPDI (area: 0.15 cm<sup>2</sup>).

|                | <b>V<sub>oc</sub> (V)</b> | <b>J<sub>SC</sub> (mA/cm<sup>2</sup>)</b> | <b>J<sub>SC,EQE</sub> (mA/cm<sup>2</sup>)</b> | <b>FF</b> | <b>PCE (%)</b> |
|----------------|---------------------------|-------------------------------------------|-----------------------------------------------|-----------|----------------|
| <b>C- NPDI</b> | 0.728                     | 28.14                                     | 25.78                                         | 0.59      | 12.04          |
| <b>A- NPDI</b> | 0.789                     | 28.14                                     | 26.58                                         | 0.65      | 14.45          |

**Table S6.** Electron mobility of electron-only devices containing a coherent arrangement of NPDI interlayer.

|                | <b>Electron mobility (cm<sup>2</sup>V<sup>-1</sup>s<sup>-1</sup>)</b> |
|----------------|-----------------------------------------------------------------------|
| <b>C- NPDI</b> | $7.905 \times 10^{-6}$                                                |
| <b>A- NPDI</b> | $1.730 \times 10^{-5}$                                                |

**Table S7.** Trap density of electron-only devices containing a coherent arrangement of NPDI interlayer.

|                | $V_{TFL}$ | $N_{trap} (\# \text{ cm}^{-3})$ |
|----------------|-----------|---------------------------------|
| <b>C-NPDI</b>  | 0.918     | $2.117 \times 10^{16}$          |
| <b>A- NPDI</b> | 0.731     | $1.686 \times 10^{16}$          |

**Table S8.** Photoresponse rate of OPVs with a coherent arrangement NPDI for on/off photocurrent ratios of 0.1 to 0.9.

|                | $\tau_{on}$        | $\tau_{off}$       |
|----------------|--------------------|--------------------|
|                | (s)                | (s)                |
| <b>C-NPDI</b>  | 1.31 $\mu\text{s}$ | 1.25 $\mu\text{s}$ |
| <b>A- NPDI</b> | 1.06 $\mu\text{s}$ | 1.22 $\mu\text{s}$ |

**Table S9.** Frequency-dependent responses of OPDs with coherent arrangement of NPDI.

|                | <b>-3 dB</b>    |             | <b>Variation</b> |
|----------------|-----------------|-------------|------------------|
|                | <b>Pristine</b> | <b>Aged</b> |                  |
| <b>C-NPDI</b>  | 351 kHz         | 345 kHz     | -1.7%            |
| <b>A- NPDI</b> | 445 kHz         | 442 kHz     | -0.6%            |
